# Supplementary material for: Visible light driven photocatalytic degradation of fluoroquinolone levofloxacin drug using Ag2O/TiO2 quantum dots: a mechanistic study and degradation pathway
Source: Royal Society of Chemistry journal article supplement (doi:10.1039/c7nj02053h), 2017-01-01
Supplement: c7nj02053h1.pdf [file c7nj02053h1.pdf]

**Electronic Supplementary Material (ESI) for New Journal of Chemistry**

**Visible light driven photocatalytic degradation of fluoroquinolone levofloxacin drug using  $\text{Ag}_2\text{O}/\text{TiO}_2$  quantum dots: A mechanistic study and degradation pathway**

**Amandeep Kaur<sup>1</sup>, Deepak Saluanke<sup>2</sup>, Ahmad Umar<sup>3\*</sup>, Surinder Kumar Mehta<sup>2</sup>, A.S.K. Sinha<sup>4</sup>, Sushil Kumar Kansal<sup>1\*</sup>**

*<sup>1</sup>Dr. S. S. Bhatnagar University Institute of Chemical Engineering & Technology, Panjab University, Chandigarh- 160014, India*

*<sup>2</sup>Department of Chemistry, Panjab University, Chandigarh-160014, India*

*<sup>3</sup>Department of Chemistry, Faculty of Science and Arts and Promising Centre for Sensors and Electronic Devices (PCSED), Najran University, Najran-11001, Kingdom of Saudi Arabia*

*<sup>4</sup>Department of Chemical Engineering and Technology, Indian Institute of Technology (Banaras Hindu University), Varanasi 221005, India*

WATERS, Q-TOF MICROMASS (ESI-MS)

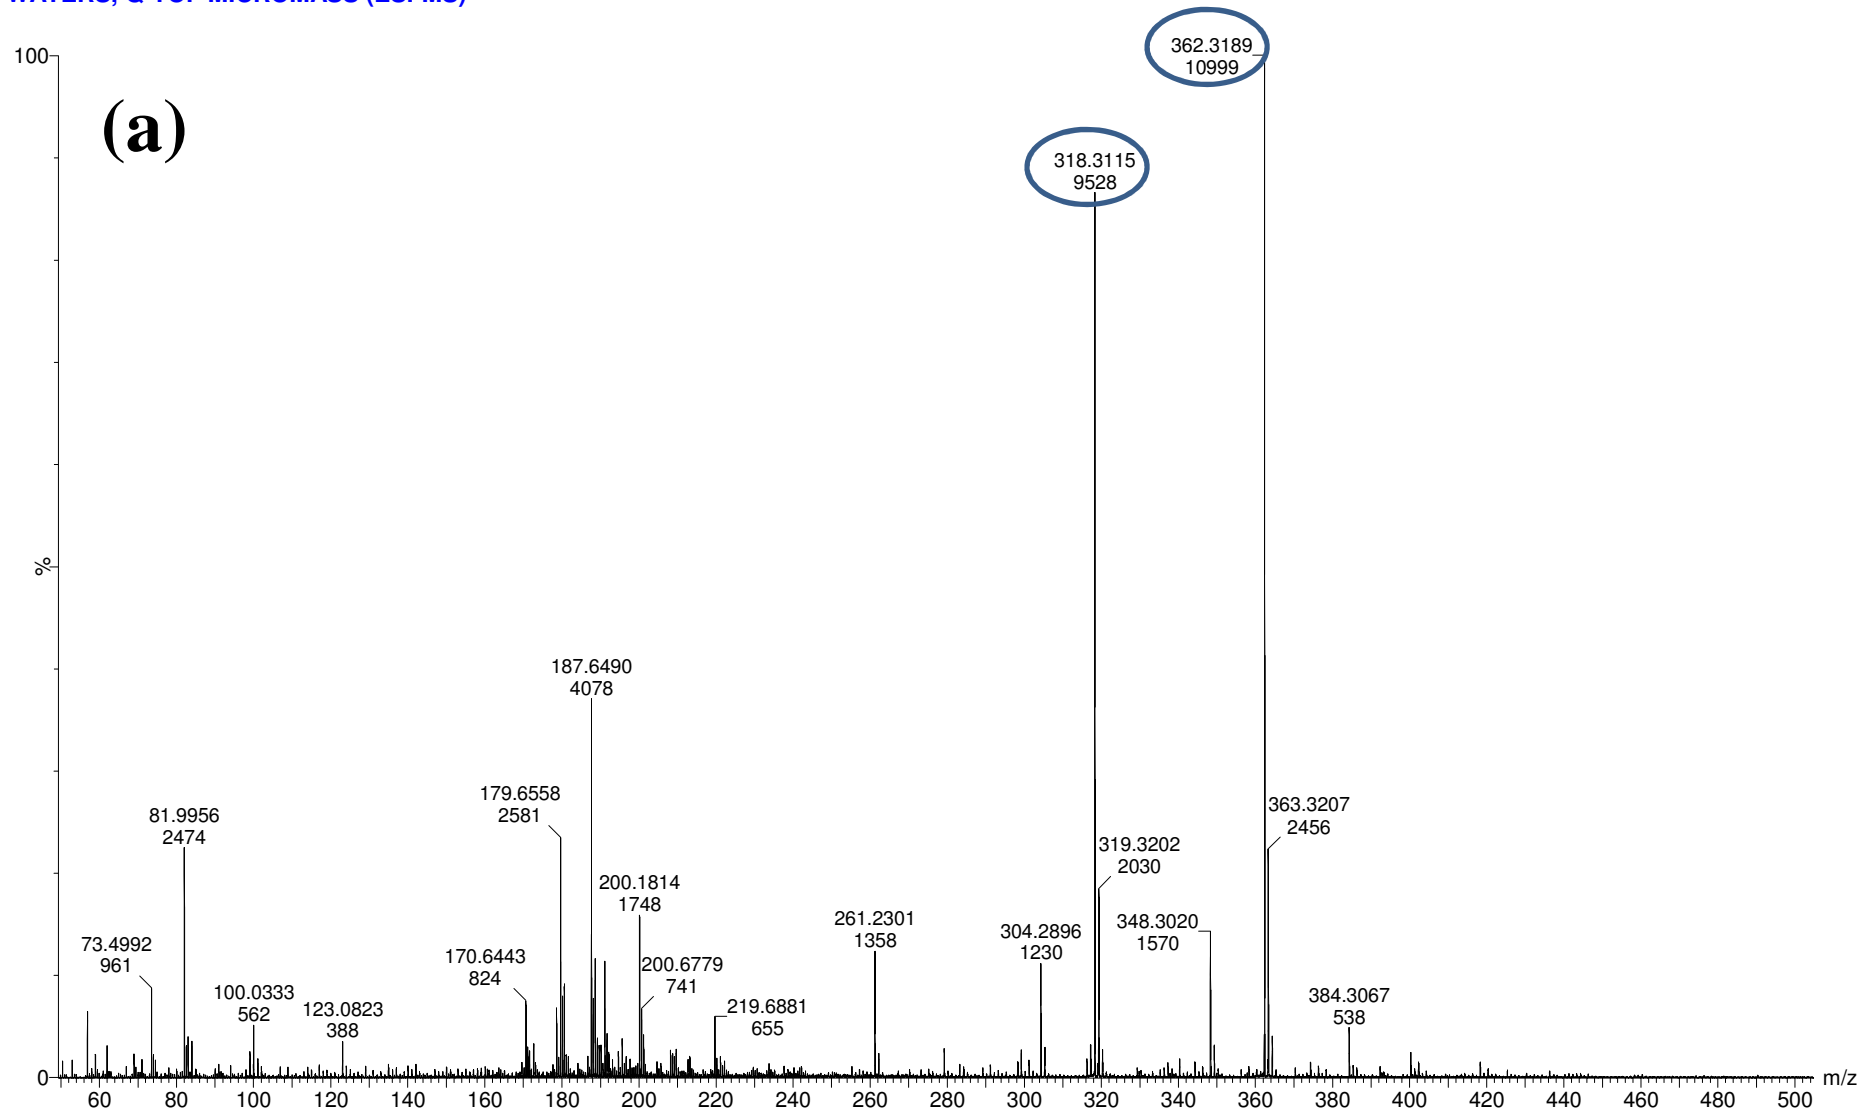

WATERS, Q-TOF MICROMASS (ESI-MS)

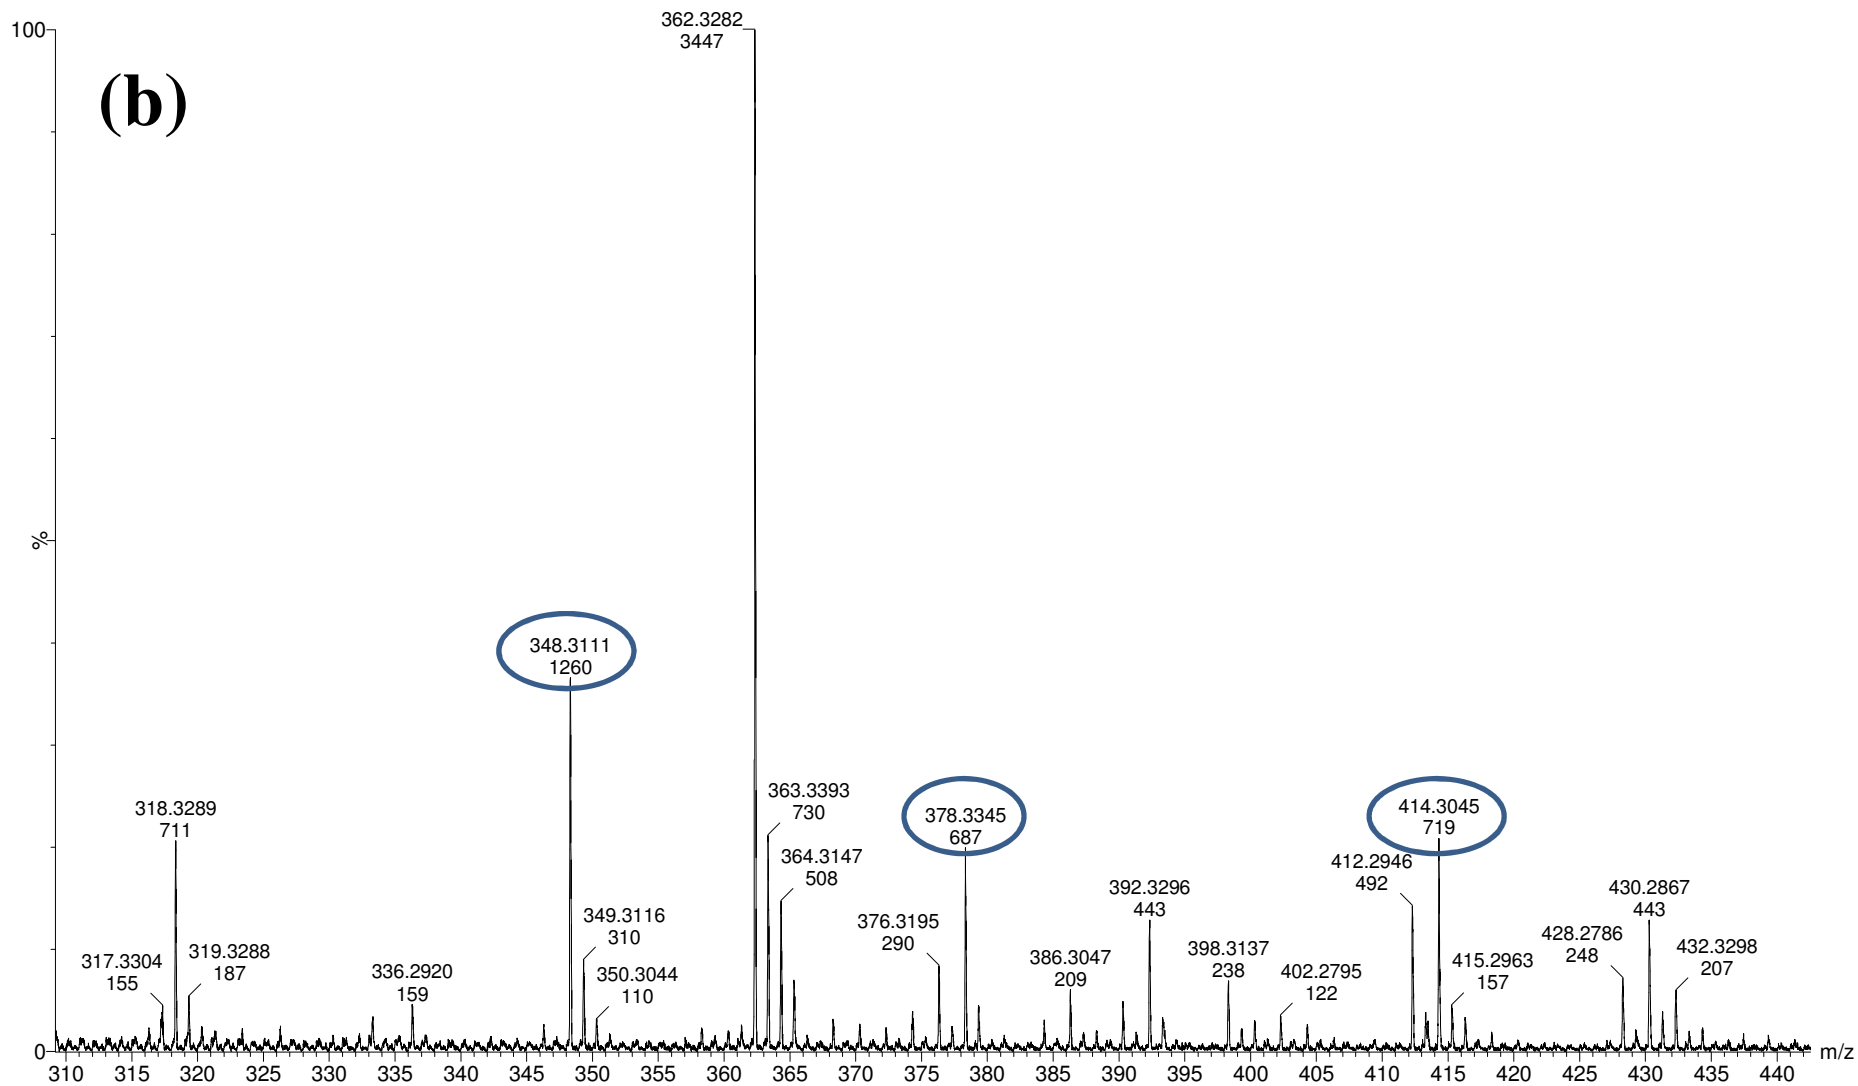

WATERS, Q-TOF MICROMASS (ESI-MS)

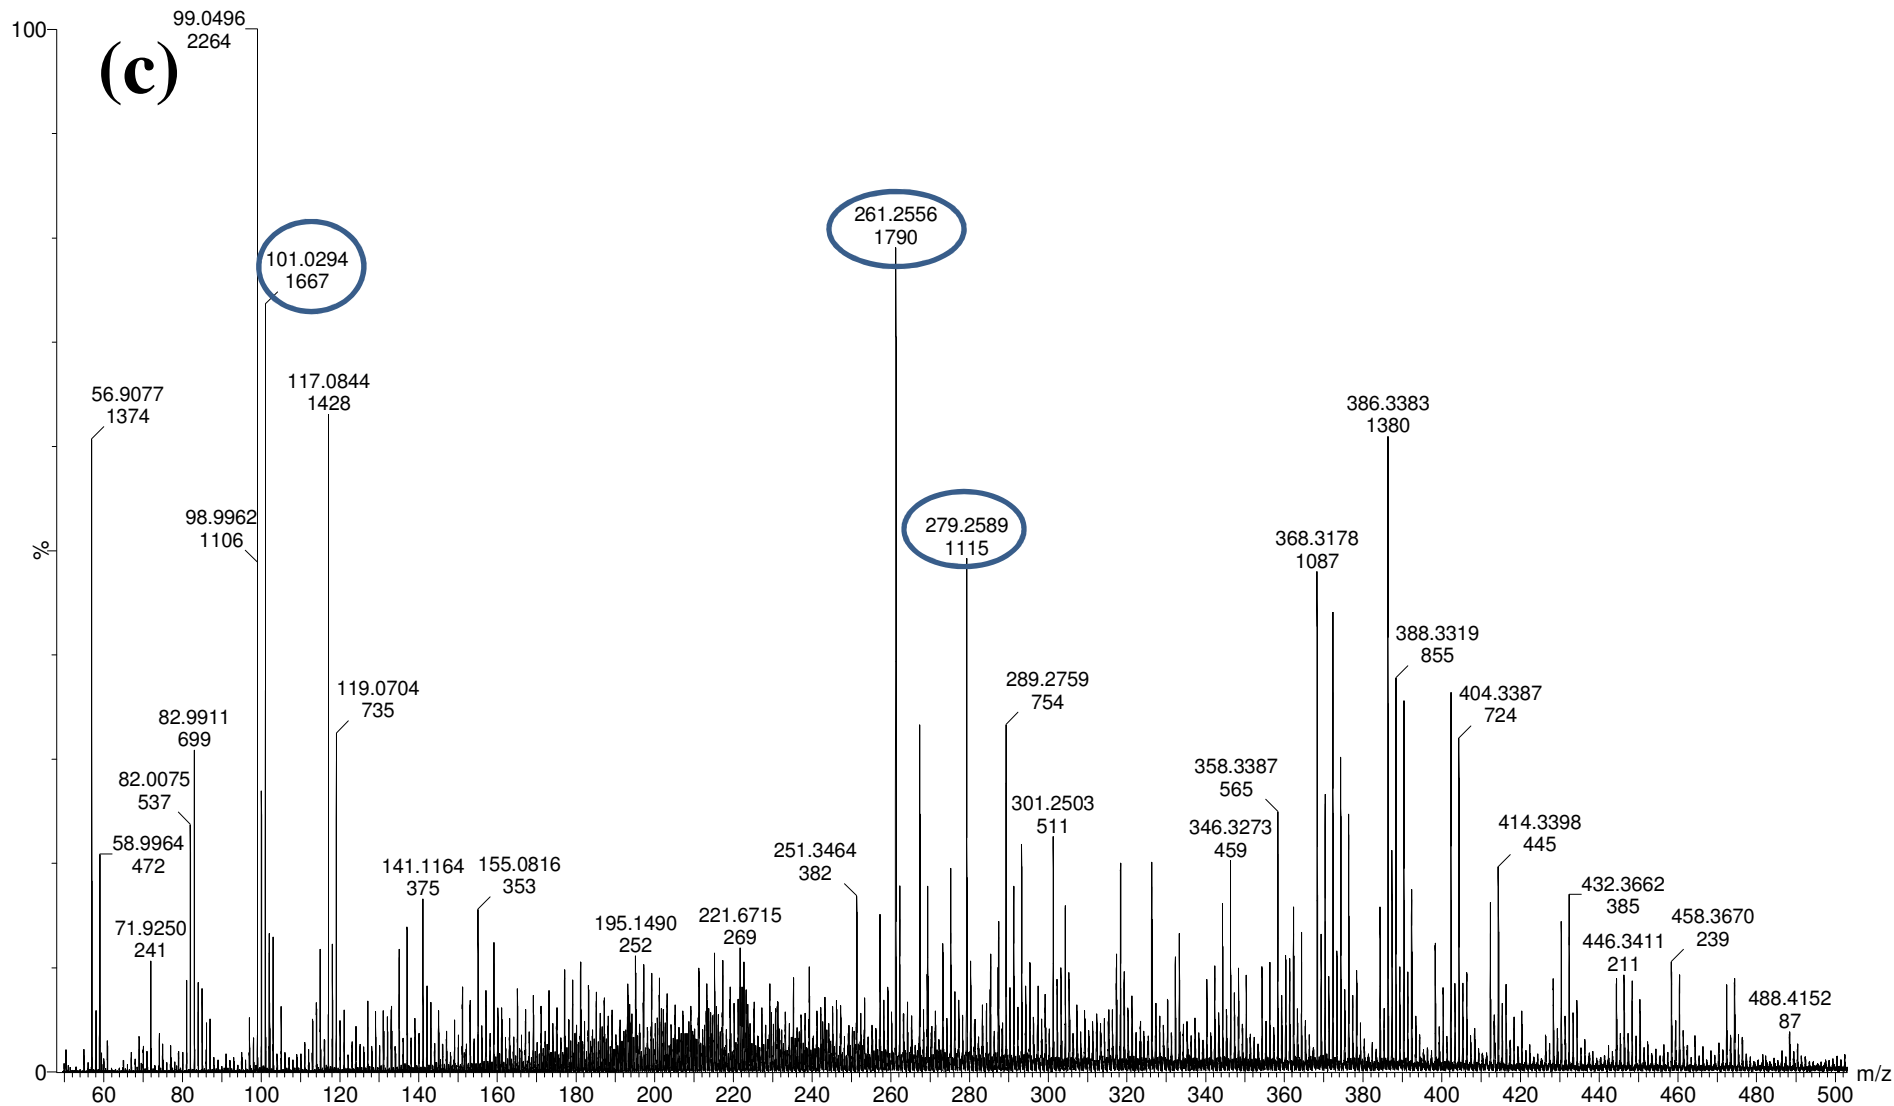

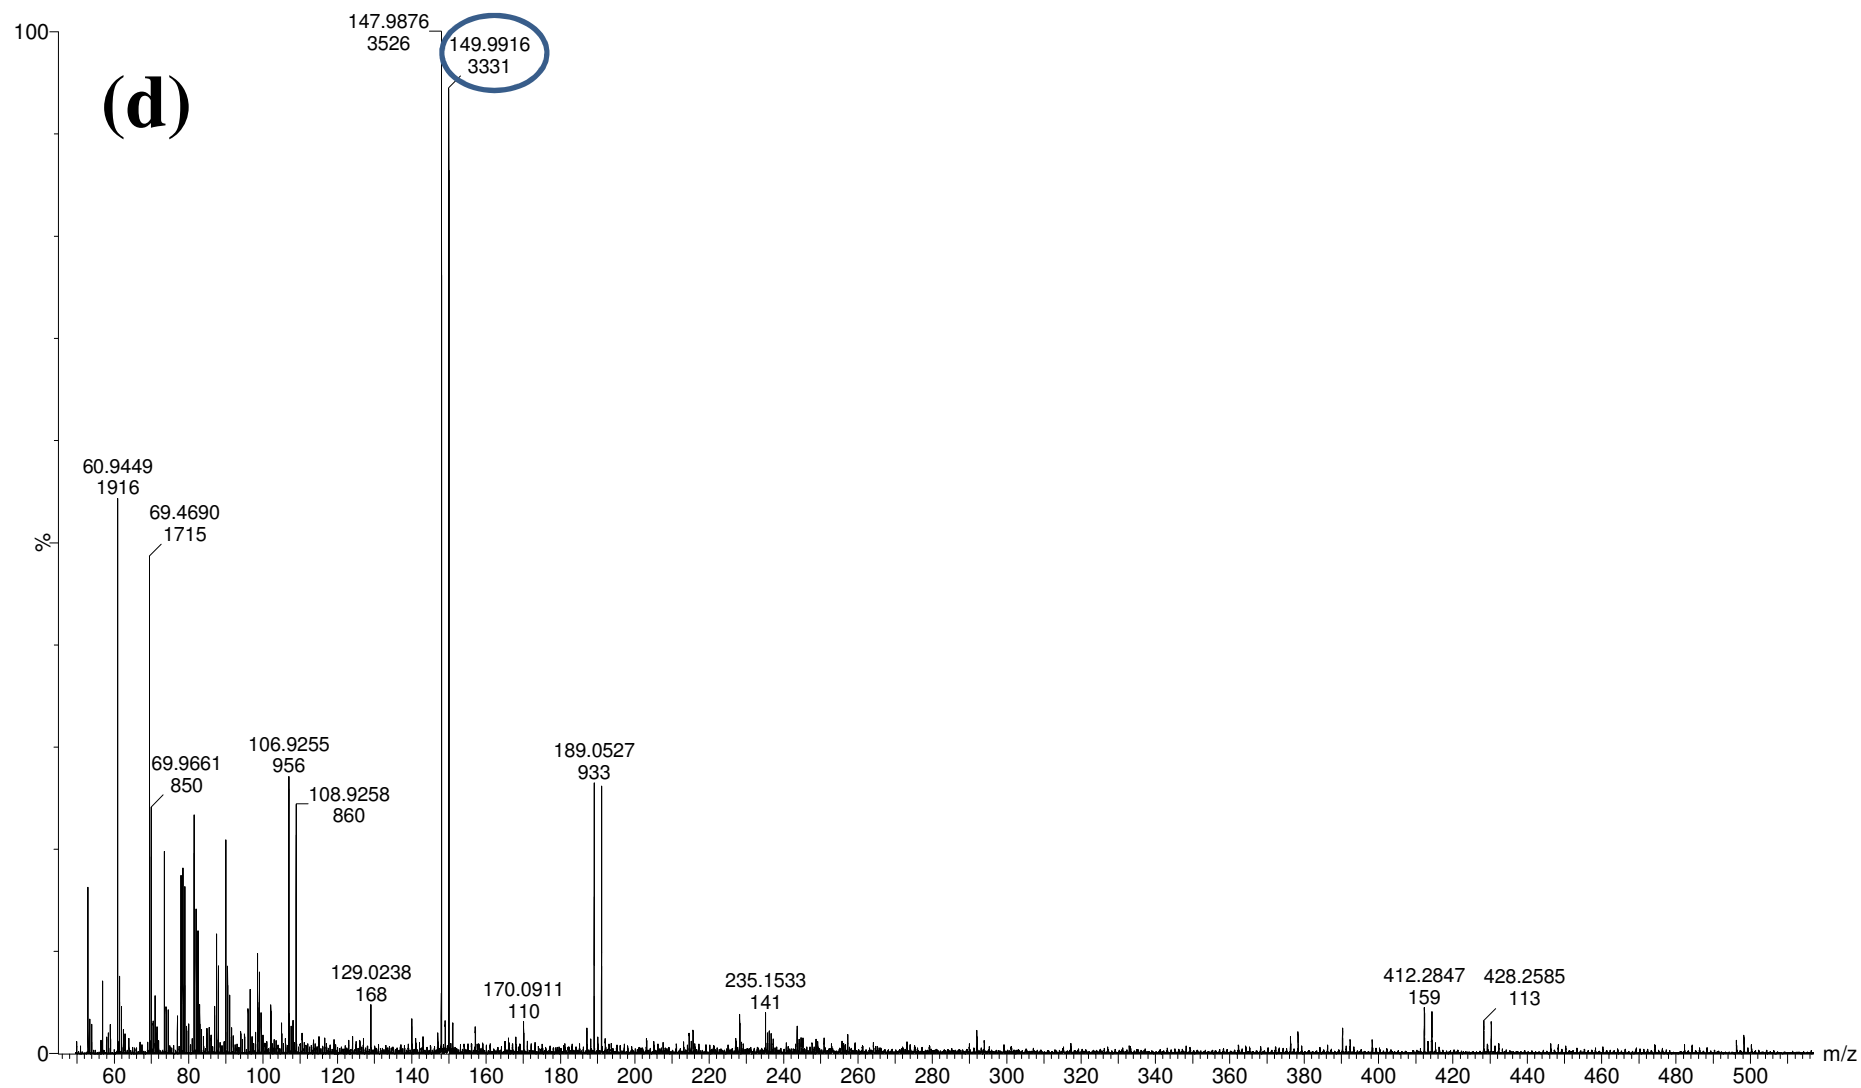

**Fig. S1.** MS spectrum of  $[M+H]^+$  ions of levofloxacin (a) parent compound; (b)- (d) its main products formed during the visible light induced photocatalytic degradation
